# Supplementary material
Source: PubMed Central journal article supplement (PMC2719357)

## Supplemental Experimental Procedures

*Primers for cloning and mutagenesis:* The primers are displayed in Table 1. The primers used for cloning *PIG3* cDNA into pGEX-4T-2 and pCMV-HA contain restriction sites for *EcoRI*, in the forward primer, and *SalI* in the reverse primer.

*RNA-Electrophoretic Mobility Shift Assay (EMSA)—In vitro* transcription and EMSA were performed as previously described (1). Purified protein (10-500 ng) was incubated at room temperature for 10 min, in a 10  $\mu$ l-reaction mixture containing 10 mM Hepes, pH 7.4, 25 mM potassium acetate, 2.5 mM magnesium acetate, 0.5  $\mu$ g yeast tRNA, 0.5% Igepal CA 630, 5% glycerol, 1 mM dithiothreitol, and 10 units of RNasin. Subsequently, 25 fmol of labeled RNA probe were added. Samples were incubated for 20 min, at room temperature, and then subjected to electrophoresis in a 5% polyacrylamide gel, at 170 V, for 90 min, using 90 mM Tris, 110 mM boric acid, and 2 mM EDTA, pH 8.5, as a running buffer. After electrophoresis, gels were incubated for 20 min in a 20% (v/v) ethanol and 10% (v/v) acetic acid aqueous solution, introduced into plastic bags and imaged using a PhosphorImager screen (BioRad).

## Supplemental Results

*Interaction of PIG3 with RNA*—We have recently demonstrated that human and yeast  $\zeta$ -crystallins bind AU-rich elements in RNA (1). Using the EMSA technique, we investigated whether PIG3 showed a similar interaction. As indicated in Fig. 1, PIG3 did not bind A(UUUA)<sub>5</sub>, an RNA sequence which is recognized by all AU-rich element binding proteins including  $\zeta$ -crystallins. No binding was either found with the probe derived from the pBluescript vector (result not shown).

## Supplemental References

1. Fernández, M. R., Porté, S., Crosas, E., Barberà, N., Farrés, J., Biosca, J. A., and Parés, X. (2007) *Cell Mol Life Sci* **64**, 1419-1427

**Supplemental Table S1. Primers for cloning and mutagenesis****PIG3**

|                            |             |                                                           |
|----------------------------|-------------|-----------------------------------------------------------|
| pGEX-4T-2<br>& pCMV-<br>HA | F           | 5'-GGTATTGGAATTC <del>C</del> CATGTTAGCCGTGCAC-3'         |
|                            | R           | 5'-AGAGGAGAGTTGTCGACCTACTGGGGCAGTTCC-3'                   |
| pET-30<br>Xa/LIC           | F           | 5'-GGTATTGAGGGTCGCATGTTAGCCGTGCAC-3'                      |
|                            | R           | 5'-AGAGGAGAGTTAGAGCCCTACTGGGGCAGTTCC-3'                   |
| Tyr51Phe                   | F (45-56)   | 5'-GCAGAGACAAGGCCAGT <u>TT</u> GTGACCCACCTCCAGGAGCC-3'    |
|                            | R (44-55)   | 5'-CCTGGAGGTGGGTCA <u>AA</u> ACTGGCCTTGTCTCTGCATTAAG-3'   |
| Tyr51Ala                   | F (45-56)   | 5'-GCAGAGACAAGGCCAG <u>GCT</u> GTGACCCACCTCCAGGAGCC-3'    |
|                            | R (44-55)   | 5'-CCTGGAGGTGGGTCA <u>CGCT</u> GGCCTTGTCTCTGCATTAAG-3'    |
| Ser151Val                  | F (145-158) | 5'-CTAATCCATGCAGGACTG <u>GTT</u> GGTGTGGGCACAGCTGCTATC-3' |
|                            | R (143-156) | 5'-GCTGTGCCACACCA <u>ACC</u> CAGTCCTGCATGGATTAGCACATAG-3' |

**ζ-crystallin**

|          |           |                                                          |
|----------|-----------|----------------------------------------------------------|
| Tyr59Phe | F (54-66) | 5'-CATTCGCTCTGGTACT <u>TT</u> TAGTAGAAAACCACTCTTACCC-3'  |
|          | R (52-64) | 5'-AGTGGTTTTCTACTAA <u>AA</u> GTACCAGAGCGAATGTATGTCT-3'  |
| Tyr59Ala | F (54-66) | 5'-CATTCGCTCTGGTACT <u>GTT</u> TAGTAGAAAACCACTCTTACCC-3' |
|          | R (52-64) | 5'-AGTGGTTTTCTACTA <u>GC</u> CAGTACCAGAGCGAATGTATGTCT-3' |

F (Forward primer). R (Reverse primer). In primers used for mutagenesis, the amino acid positions that correspond to primers are displayed in brackets. Mutated nucleotides are underlined.

### Supplemental Figure S1

Figure S1 Binding analysis of A(UUUA)<sub>5</sub> with Zta1p (yeast  $\zeta$ -crystallin) and PIG3 using EMSA. RNA sequences containing A(UUUA)<sub>5</sub> were labeled with <sup>32</sup>P-UTP and incubated with increasing amounts of purified PIG3. Zta1p (100 ng) was used as a positive control of interaction. Positions of free probe (f) and shifted complex (c) are indicated.

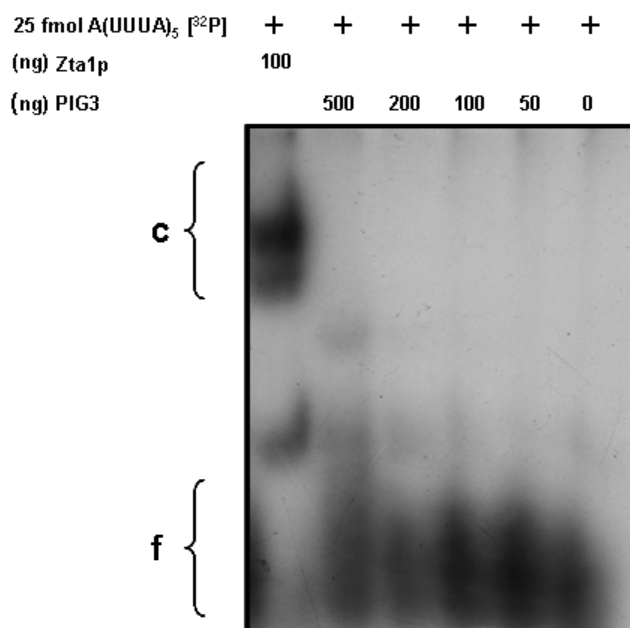

Supplement: M109.001800_1.pdf [file M109.001800_1.pdf]
